# Supplementary material for: Synergistic neuroprotective effect of schisandrin and nootkatone on regulating inflammation, apoptosis and autophagy via the PI3K/AKT pathway
Source: Royal Society of Chemistry journal article supplement (doi:10.1039/c9fo02927c), 2020-01-01
Supplement: c9fo02927c1.pdf [file c9fo02927c1.pdf]

Supplementary Data

Table

Table S1 Primer sequences used for qPCR analysis.

| Gene           | Forward                             | Reverse                      |
|----------------|-------------------------------------|------------------------------|
| PI3K           | 5'-ATGTGTATGGACCCGGAAGG-3'          | 5'-AGCCATCTGCCTCCACGTTAG-3'  |
| AKT            | 5'-ACTCATTCCAGACCCACGAC-3'          | 5'-CCGGTACACCACGTTCTTCT-3'   |
| Caspase3       | 5'-TGA CTGGAAAGCCGAAACT-3'          | 5'-GGGTGCGGTAGAGTAAGCAT-3'   |
| p62            | 5'-ATCAGCTTCTGGTCCATCGG-3'          | 5'-GCTTCTTTTCCCTGTGCT-3'     |
| Atg5           | 5'-CCCAGTATCCCTCACTTAC-3'           | 5'-GCTAGGGTGAGTCCATTAT-3'    |
| Beclin1        | 5'-ATCCTGGACCGTGTCACCATCCAGG-<br>3' | 5'-GTTGAGCTGAGTGTCCAGCTGG-3' |
| $\beta$ -actin | 5'-CACCCGCGAGTACAACCTTC-3'          | 5'-CCCATACCCACCATCACACC-3'   |

## Figures

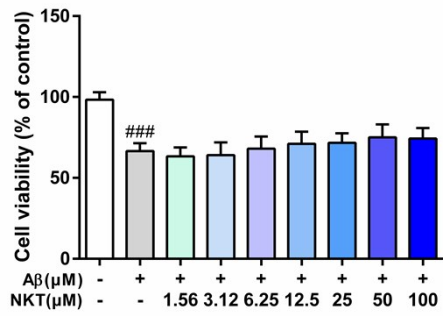

A

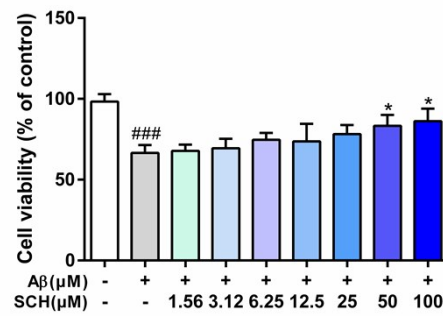

B

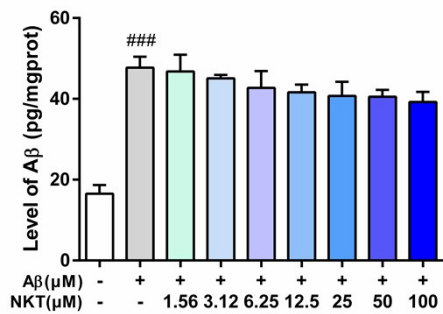

C

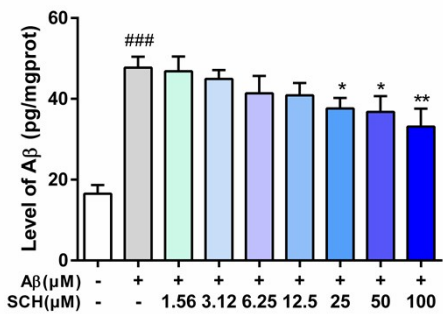

D

Fig. S1 PC12 cells were pretreated with different concentrations of NKT/ SCH for 4 h, and then incubated with 20μM Aβ for 20 h. The cell viability (A and B) was determined using MTT assay and the inhibition of Aβ level was determined using ELISA assay (C and D). The values represent the mean ± SD (n = 3 in each group), \*p < 0.05, \*\*p < 0.01, \*\*\*p < 0.001 versus the Aβ group; ###p < 0.001 versus the control group.
